# Supplementary material for: Active three-way catalysis of rhodium particles with a low oxidation state maintained under an oxidative atmosphere on a La-containing ZrO2 support
Source: Royal Society of Chemistry journal article supplement (doi:10.1039/c3cc00006k), 2013-01-01
Supplement: c3cc00006k.pdf [file c3cc00006k.pdf]

**Electronic Supplementary Information for Chemical Communication**

**Active three-way catalysis of rhodium particles with low oxidation state maintained under oxidative atmosphere on La-containing ZrO<sub>2</sub> support**

**Hisaya Kawabata<sup>a,\*</sup>, Yuki Koda<sup>a</sup>, Hirosuke Sumida<sup>a</sup>, Masahiko Shigetsu<sup>a</sup>, Akihide Takami<sup>a</sup> and Kei Inumaru<sup>b</sup>**

<sup>a</sup> *Advanced Materials Research Field, Technical Research Center, Mazda Motor Corporation, 3-1 Shinchi, Fuchu-cho, Aki-gun, Hiroshima 730-8670, Japan. E-mail: [kawabata.h@mazda.co.jp](mailto:kawabata.h@mazda.co.jp); Fax: +81-82-252-5068; Tel: +81-82-252-5342*

<sup>b</sup> *Department of Applied Chemistry, Graduate School of Engineering, Hiroshima University, 1-4-1 Kagamiyama, Higashi-Hiroshima 739-8527, Japan. E-mail: [inumaru@hiroshima-u.ac.jp](mailto:inumaru@hiroshima-u.ac.jp); Fax: +81-82-424-5494; Tel: +81-82-424-7741*

## Experimental details

ZrO<sub>2</sub>-La<sub>2</sub>O<sub>3</sub> mixed oxide was prepared by an ammonium co-precipitation method. ZrO(NO<sub>3</sub>)<sub>2</sub>·6H<sub>2</sub>O (60.8 g) and La(NO<sub>3</sub>)<sub>3</sub>·6H<sub>2</sub>O (5.2 g) or Pr(NO<sub>3</sub>)<sub>3</sub>·6H<sub>2</sub>O (5.2 g) were dissolved in 200 g of water, followed by addition of an aqueous NH<sub>4</sub>OH solution (1.0%) to raise the pH to 12 or more. The precipitate was dried at 423 K for 2 h in air, and calcined at 773 K for 2 h in air. The additive content of the lanthanoid was 5.0 wt% as oxide (La<sub>2</sub>O<sub>3</sub> or Pr<sub>6</sub>O<sub>11</sub>). Pure ZrO<sub>2</sub> support (BET surface area: 52.3 m<sup>2</sup> g<sup>-1</sup>) was purchased from Kishida Chemical Co., Ltd (Osaka, Japan). Rhodium (0.33 wt% as rhodium metal) was loaded on these oxide supports by impregnation using an aqueous solution of Rh(NO<sub>3</sub>)<sub>3</sub>·H<sub>2</sub>O, followed by calcination in air at 773 K.

The catalytic activity was evaluated using a fixed-bed continuous flow reactor. The Rh/ZrO<sub>2</sub>, Rh/Zr-La-O, or Rh/Zr-Pr-O catalysts were dispersed on a Cordierite honeycomb (loading amount: 100 g L<sup>-1</sup>). The reaction gas was a mixture of 500 ppm C<sub>3</sub>H<sub>6</sub>, 1000 ppm NO, 0.7% CO, 0.2% H<sub>2</sub>, 0.6% O<sub>2</sub>, 10% H<sub>2</sub>O and the balance of nitrogen. Oxygen, carbon monoxide and hydrogen were added periodically under fluctuating conditions. One cycle of 1.0 Hz frequency consisted of four periods. The first period involved oxygen insertion into the static gas for 0.25 s; the second, no insertion of added gas; the third, insertion of carbon monoxide and hydrogen for 0.25 s; and the last, no insertion resulting in oxygen, carbon monoxide and hydrogen concentrations changing periodically between 0.43 and 1.86%, 0.7 and 2.9% and 0.20 and 0.74% for the three gases, respectively. The flow rate of the reaction gas was 26 dm<sup>3</sup> min<sup>-1</sup> corresponding to a GSHV of 60,000 h<sup>-1</sup>. Before measurement of the catalytic performance, the catalysts were pre-treated under a flow of gas mixture at 773 K for 10 min and then cooled to 373 K under flowing nitrogen. Products were analysed continuously using a flame ionisation detector for hydrocarbon, infrared for carbon monoxide, and chemical luminescence for NO contents with a Horiba MEXA-9100 evaluation system (Kyoto, Japan).

XPS spectra were obtained with a PerkinElmer ESCA5600 by using Mg K $\alpha$  radiation (400 W). Binding energies were referred to as C1s (284.5 eV). Before measurement of the XPS spectra, two types of pre-treatment were carried out. The first pre-treatment method was used to obtain information on rhodium during the reaction, using TEM measurements where samples were treated under the reaction gas at 773 K for 10 min and then cooled to room temperature under nitrogen flow. The other was to obtain information on rhodium under oxidative gas conditions, where samples were pre-treated under a flow of 5.0% O<sub>2</sub> at 773 K for 10 min, and then cooled to room temperature under nitrogen flow. CO-TPR was carried out using CO (0.6%)/He as reducing gas (100 cm<sup>3</sup> min<sup>-1</sup>) at a heating rate of 30 K min<sup>-1</sup>. Prior to TPR measurements, samples were pre-treated under a flow of 5.0% O<sub>2</sub> at 773 K for 10 min, and then cooled to 323 K under a flow of helium.

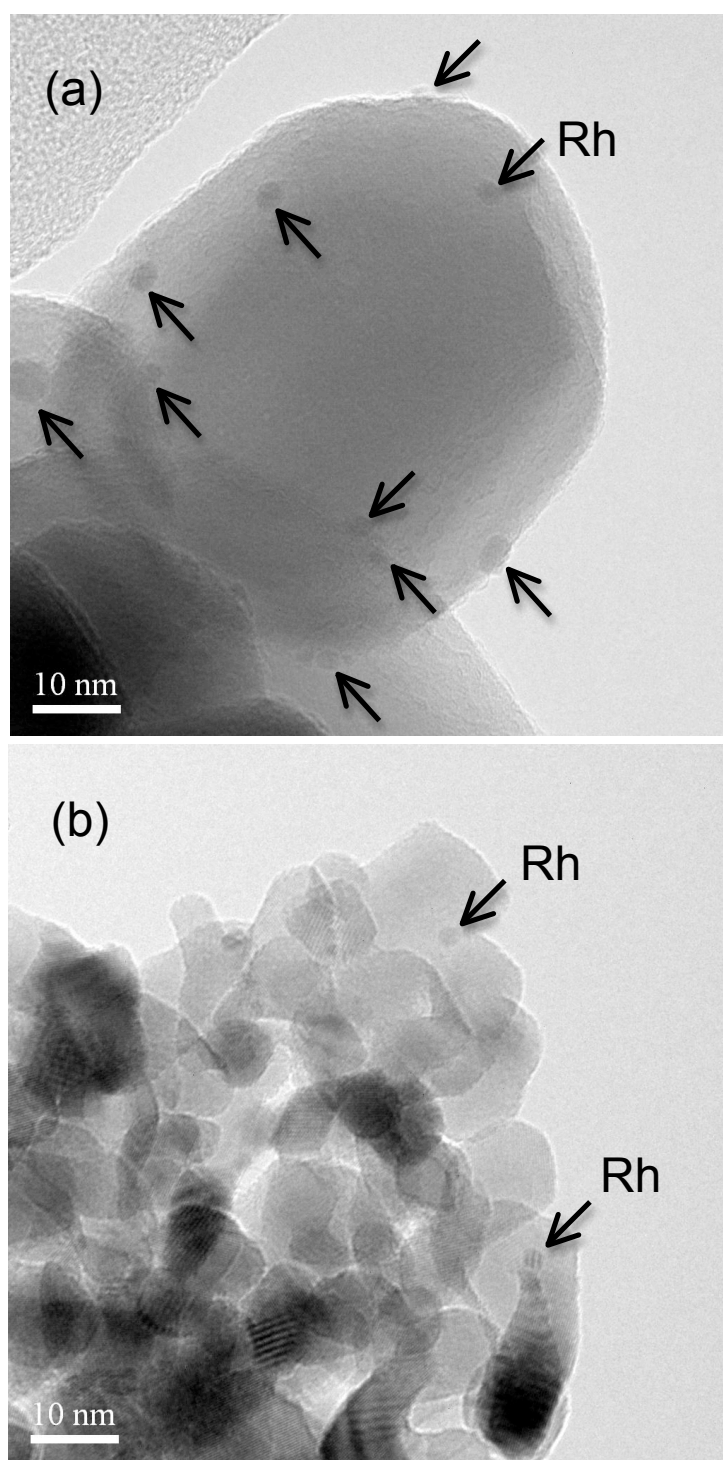

**Fig.S1** TEM micrographs of (a) Rh/ZrO<sub>2</sub>, (b) Rh/Zr-La-O after three-way catalytic reaction at 773 K for 10 min.

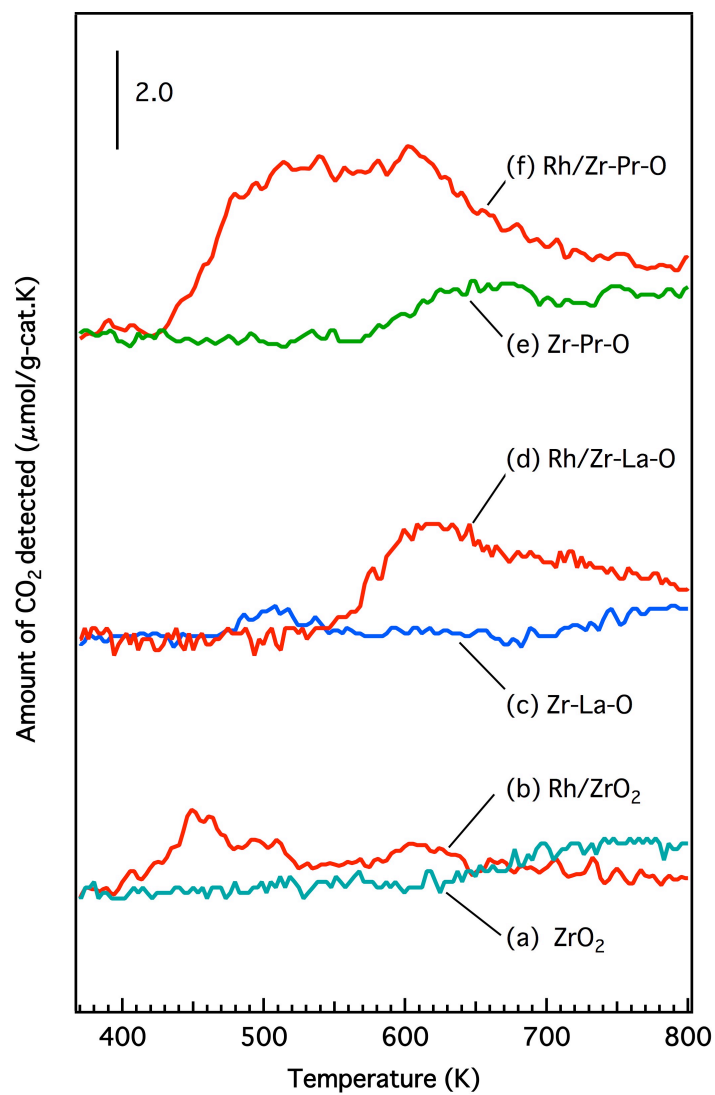

**Fig. S2** CO-TPR of (a)ZrO<sub>2</sub>, (b)Rh/ZrO<sub>2</sub>, (c) Zr-La-O, (d) Rh/Zr-La-O, (e) Zr-Pr-O and (f) Rh/Zr-Pr-O after 5% O<sub>2</sub>/He treatment for 10 min at 773 K.
